# Supplementary material
Source: PubMed Central journal article supplement (PMC7659586)
Supplement: mmc1.pdf [file mmc1.pdf]

**Cell Reports Medicine, Volume 1**

**Supplemental Information**

**Temporal Detection and Phylogenetic Assessment  
of SARS-CoV-2 in Municipal Wastewater**

**Artem Nemudryi, Anna Nemudraia, Tanner Wiegand, Kevin Surya, Murat Buyukyoruk, Calvin Cicha, Karl K. Vanderwood, Royce Wilkinson, and Blake Wiedenheft**

2020/03/27

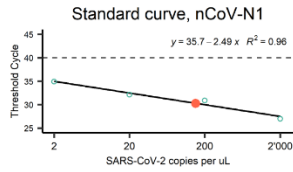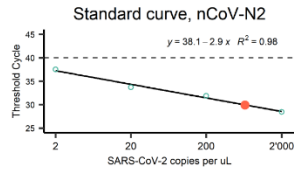

2020/04/03

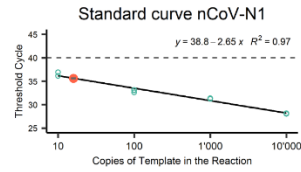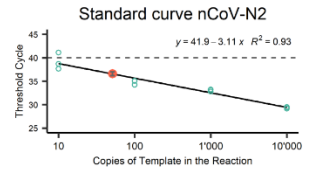

2020/03/30

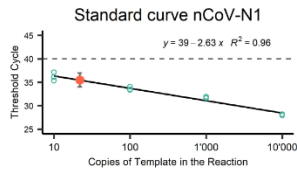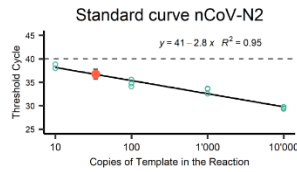

2020/04/06

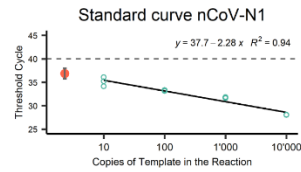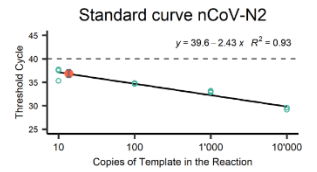

2020/04/01

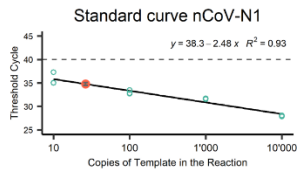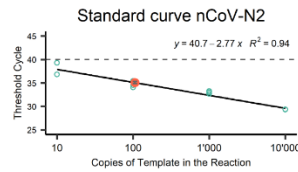

2020/04/08

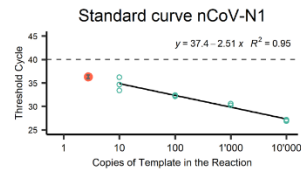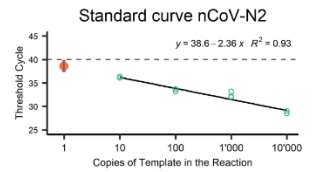

**Supplemental Figure S1, related to Figure 1.** Standard curves for absolute quantification of SARS-CoV-2 titers. Standard curves were generated for each RT-qPCR run. A 10-fold dilution series of positive control plasmid (IDT#10006625) encoding for SARS-CoV-2 N gene were used, three technical replicates at each dilution (green circles). Data was plotted as Cycle Threshold (Ct) on y-axis versus log10(copy number) on x-axis. Trend lines were fitted to the data by linear regression analysis in RStudio v1.2.1335, Linear equations and R2 values are shown for each standard curve. Red dots show mean Ct values for wastewater samples. Error bars represent standard deviation of Ct values.

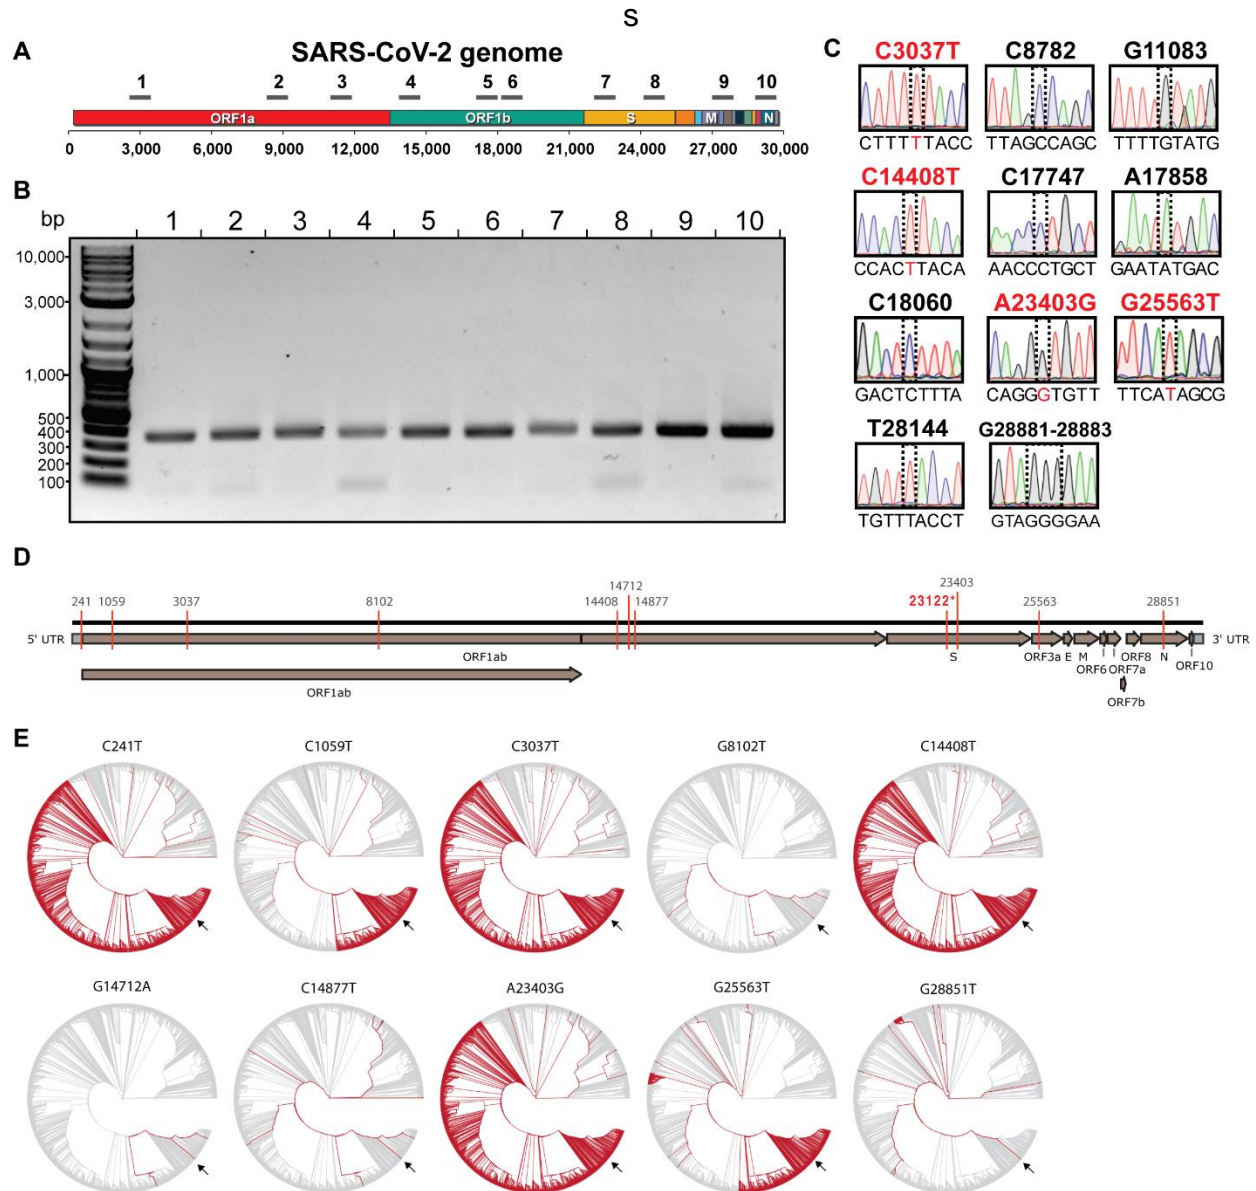

**Supplemental Figure S2, related to Figure 2. A)** Map of the SARS-CoV-2 genome. The solid black lines indicate the approximate location of 10 amplicons spanning phylogenetically informative regions of the genome. **B)** Agarose gel of the corresponding PCR products. **C)** Ten PCR products shown in **B** were gel-purified and used to sequence 13 polymorphic sites in SARS-CoV-2 genome<sup>44</sup>. Sanger traces (9-bp windows) are shown for each polymorphic site (dotted boxes). Nucleotide numbering is based on the reference genome Wuhan-Hu-1/2019<sup>25</sup>. Highlighted in red are nucleotide substitutions relative to the reference. **D)** Genetic map of SARS-CoV-2 with mutations present in Bozeman wastewater sequence highlighted. \*Variant A23122T was further filtered out as an artifact of sequencing library preparation (see explanation in the main text). **E)** Phylogenetic tree with each mutation present in Bozeman wastewater mapped in red. The SARS-CoV-2 sequence from Bozeman wastewater is indicated by black arrow.

**Supplemental Table S1, related to Fig 1. Total wastewater flow volumes and SARS-CoV-2 RNA concentration in composite samples**

| Sampling date  | SARS-CoV-2 RNA concentration estimated with N1, copies / L* | SARS-CoV-2 RNA concentration estimated with N2, copies / L* | Total daily flow volume, L |
|----------------|-------------------------------------------------------------|-------------------------------------------------------------|----------------------------|
| March 30, 2020 | 528.9 ± 249                                                 | 665.6 ± 261.5                                               | 22,871,458                 |
| April 1, 2020  | 432.7 ± 66.3                                                | 1710.8 ± 179.2                                              | 24,097,932                 |
| April 3, 2020  | 254.7 ± 5.4                                                 | 836.3 ± 144.6                                               | 23,287,853                 |
| April 6, 2020  | 57.6 ± 38                                                   | 257.4 ± 93.8                                                | 23,882,163                 |
| April 8, 2020  | 46 ± 9.2                                                    | 23.5 ± 14.6                                                 | 23,628,540                 |
| April 15, 2020 | 76 ± 24                                                     | 46.7 ± 4.2                                                  | 22,761,681                 |
| April 22, 2020 | 44.6 ± 5.6                                                  | 22.2 **                                                     | 22,492,917                 |
| April 29, 2020 | 43.5 ± 34.4                                                 | 24.6 ± 1.5                                                  | 22,273,363                 |
| May 6, 2020    | 0 ***                                                       | 0                                                           | 22,720,042                 |
| May 13, 2020   | 0                                                           | 0                                                           | 22,473,990                 |
| May 20, 2020   | 0                                                           | 0                                                           | 22,750,325                 |
| May 27, 2020   | 0                                                           | 0                                                           | 22,807,106                 |
| June 3, 2020   | 5400.5 ± 1046.1                                             | 6116.2 ± 1034.8                                             | 22,121,947                 |
| June 5, 2020   | 4174.6 ± 749.1                                              | 5624.6 ± 2509.2                                             | 21,754,762                 |
| June 8, 2020   | 2464.2 ± 502.4                                              | 1429 ± 322.4                                                | 21,016,606                 |
| June 10, 2020  | 971.9 ± 21.5                                                | 1947.9 ± 62.4                                               | 23,102,368                 |
| June 12, 2020  | 1762.7 ± 733.1                                              | 2291.4 ± 680.9                                              | 22,591,338                 |

\*Data shown as mean ± sem, n = 3

\*\* Only one of three replicates showed amplification

\*\*\* Samples tested negative and thus were called 0 copies/L

**Supplemental Table S2, related to Methods. Primer design used for RT-PCR (Supplemental Fig S2A,B)**

| PCR product | Primer             | Sequence (5'-3')              |
|-------------|--------------------|-------------------------------|
| 1           | nCoV-2019_10_LEFT  | TGAGAAGTGCTCTGCCTATACAGT      |
|             | nCoV-2019_10_RIGHT | TCATCTAACCAATCTTCTTCTTGCTCT   |
| 2           | nCoV-2019_29_LEFT  | ACTTGTGTTCCCTTTTTGTTGCTGC     |
|             | nCoV-2019_29_RIGHT | AGTGTACTCTATAAGTTTTGATGGTGTGT |
| 3           | nCoV-2019_37_LEFT  | ACACACCACTGGTTGTTACTCAC       |
|             | nCoV-2019_37_RIGHT | GTCCACACTCTCCTAGCACCAT        |
| 4           | nCoV-2019_48_LEFT  | TGTTGACACTGACTTAACAAAGCCT     |
|             | nCoV-2019_48_RIGHT | TAGATTACCAGAAGCAGCGTGC        |
| 5           | nCoV-2019_59_LEFT  | TCACGCATGATGTTTCATCTGCA       |
|             | nCoV-2019_59_RIGHT | AAGAGTCCTGTTACATTTTCAGCTTG    |
| 6           | nCoV-2019_60_LEFT  | TGATAGAGACCTTTATGACAAGTTGCA   |
|             | nCoV-2019_60_RIGHT | GGTACCAACAGCTTCTCTAGTAGC      |
| 7           | nCoV-2019_77_LEFT  | CCAGCAACTGTTTGTGGACCTA        |
|             | nCoV-2019_77_RIGHT | CAGCCCCTATTAACAGCCTGC         |
| 8           | nCoV-2019_84_LEFT  | TGCTGTAGTTGTCTCAAGGGCT        |
|             | nCoV-2019_84_RIGHT | AGGTGTGAGTAAACTGTTACAAACAAC   |
| 9           | nCoV-2019_93_LEFT  | TGAGGCTGGTTCTAAATCACCCA       |
|             | nCoV-2019_93_RIGHT | AGGTCTTCCTTGCCATGTTGAG        |
| 10          | nCoV-2019_95_LEFT  | TGAGGGAGCCTTGAATACACCA        |
|             | nCoV-2019_95_RIGHT | CAGTACGTTTTTGCCGAGGCTT        |
